# Supplementary material for: A bio-inspired electronic synapse using solution processable organic small molecule
Source: Royal Society of Chemistry journal article supplement (doi:10.1039/c8tc05489d), 2018-12-21
Supplement: c8tc05489d1.pdf [file c8tc05489d1.pdf]

## Supplementary information

### **A bio-inspired electronic synapse using solution processable organic small molecule**

Jing-Yu Mao,<sup>a</sup> Li Zhou,<sup>a</sup> Yi Ren,<sup>a</sup> Jia-Qin Yang,<sup>a</sup> Chih-Li Chang,<sup>b</sup> Heng-Chuan Lin,<sup>b</sup> Ho-Hsiu Chou,<sup>\*b</sup> Shi-Rui Zhang,<sup>a</sup> Ye Zhou,<sup>\*a</sup> and Su-Ting Han<sup>\*a</sup>

<sup>a</sup>College of Electronic Science & Technology and Institute for Advanced Study, Shenzhen University, Shenzhen, 518060, P. R. China.

\*E-mail: yezhou@szu.edu.cn; sutinghan@szu.edu.cn

<sup>b</sup>Department of Chemical Engineering, National Tsing Hua University, Hsinchu, Taiwan.

\*E-mail: hhchou@mx.nthu.edu.tw

Table S1. Computational energy levels, excitation energies and oscillator strengths, and orbital transition analyses of  $S_1$  for BCPO based on the optimized ground state ( $S_0$ ) Geometry.

| Excited State | state | $\lambda_{cal}$ (nm) | f (oscillator strength) | assignments                                            |
|---------------|-------|----------------------|-------------------------|--------------------------------------------------------|
| 1             | $S_1$ | 330.15               | 0.3656                  | HOMO $\rightarrow$ LUMO<br>HOMO-1 $\rightarrow$ LUMO+1 |
| 2             | $S_1$ | 324.17               | 0.1202                  | HOMO-1 $\rightarrow$ LUMO<br>HOMO $\rightarrow$ LUMO+1 |

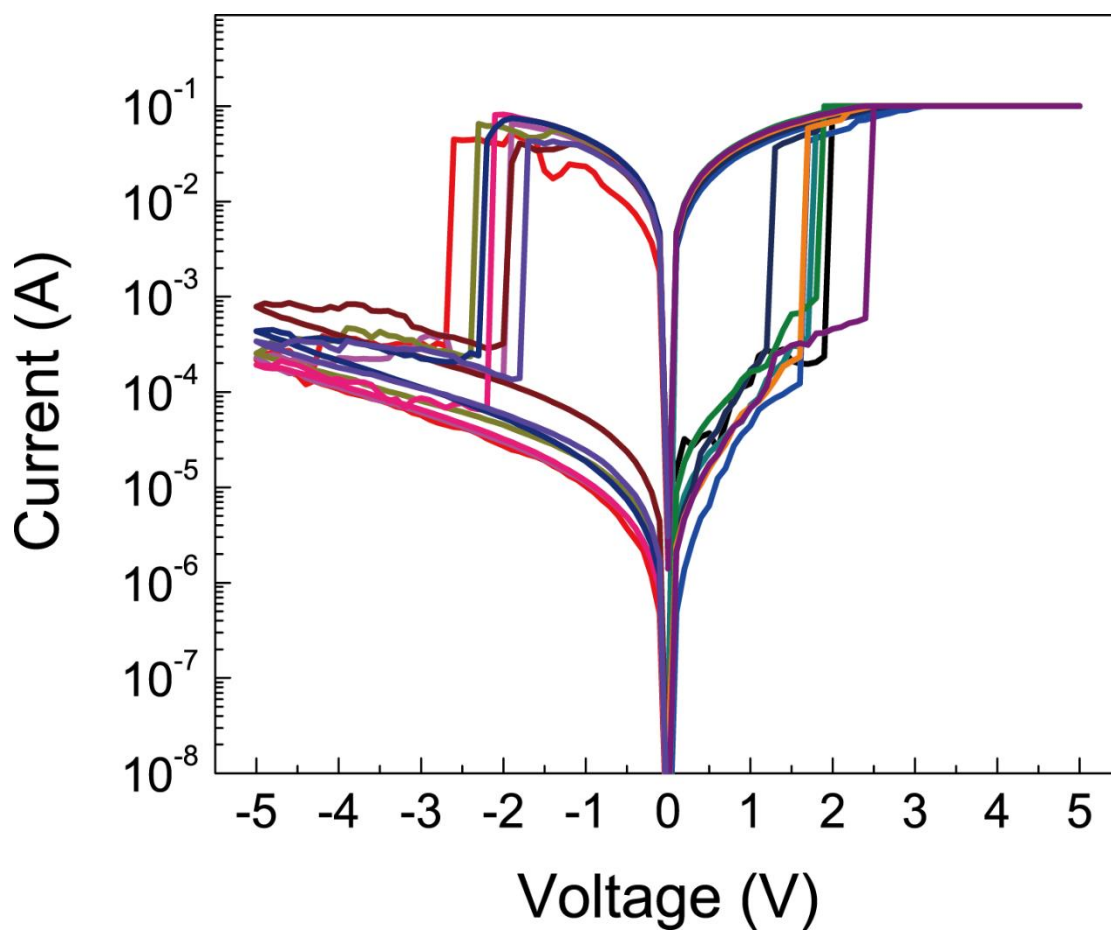

Fig. S1 Typical  $I$ - $V$  tests for device with Au top electrode.

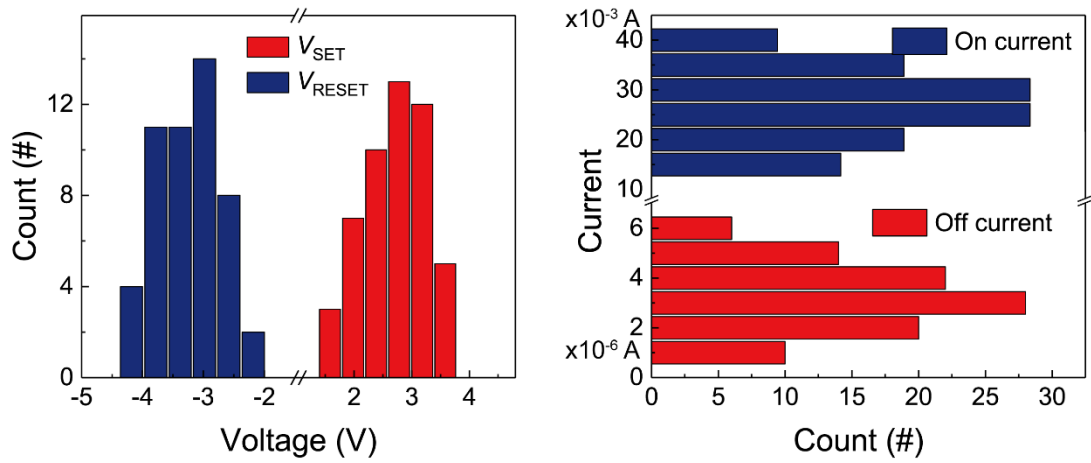

Fig. S2 Histograms of the  $V_{SET}$ ,  $V_{RESET}$ ,  $I_{On}$  and  $I_{Off}$  for 50 samples from 10 fabricated devices.

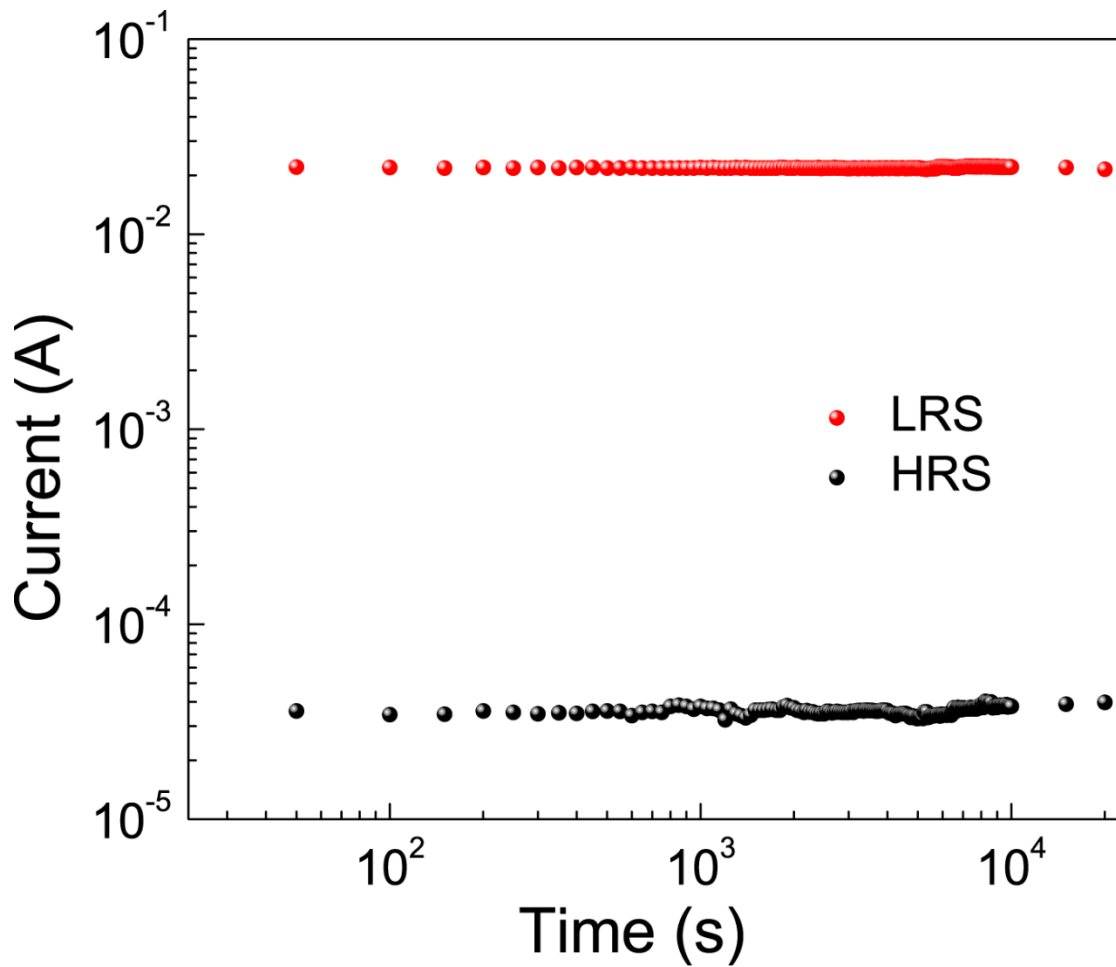

Fig. S3 Retention characteristics for device with Au top electrode.

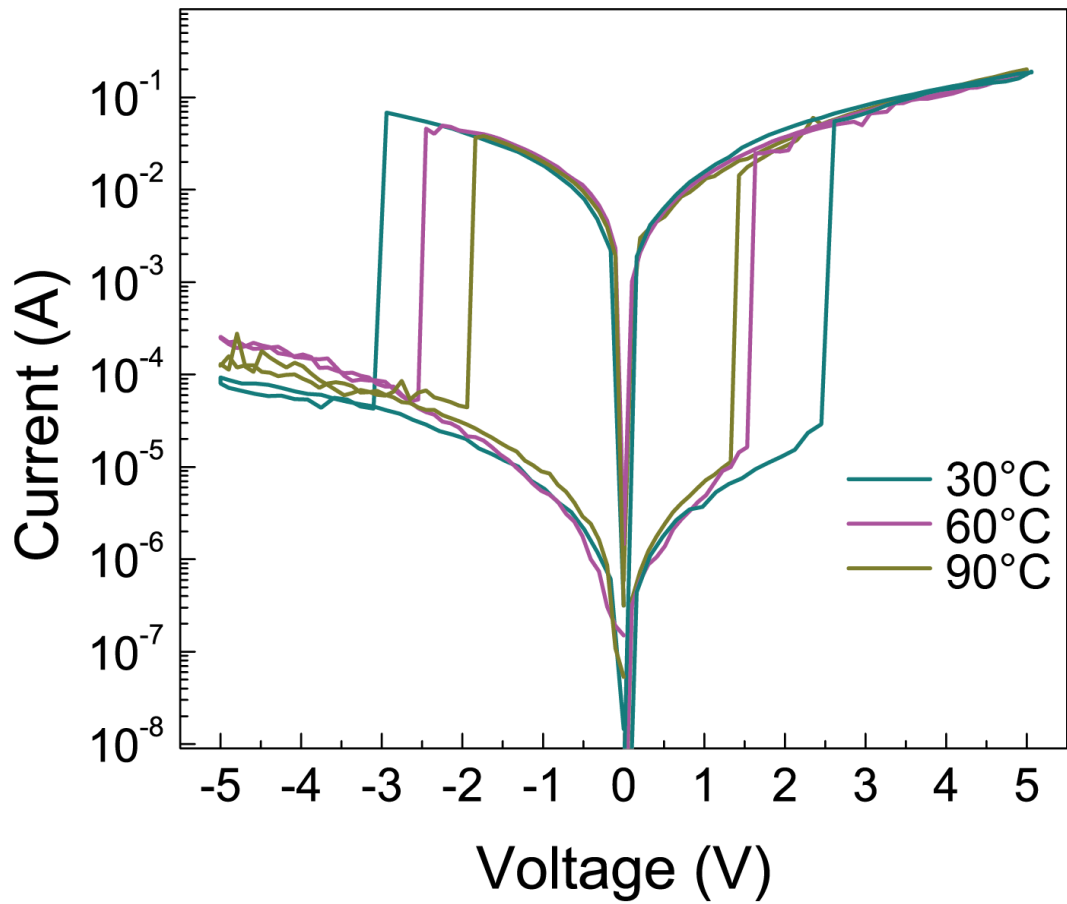

Fig. S4 Typical *I-V* tests under different temperatures for Al/BCPO/ITO device.

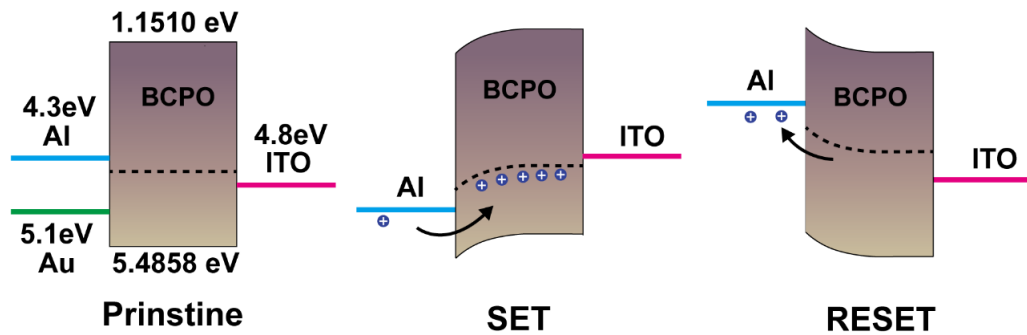

Fig. S5 Energy band diagram of pristine device and the device under SET/RESET operation.

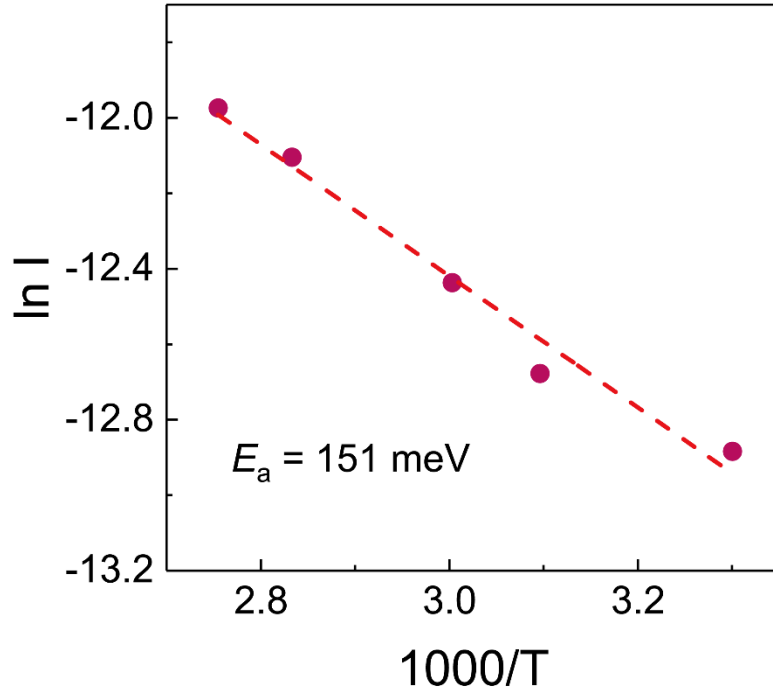

**Fig. S6** The temperature dependence of currents in HRS.

Based on the SCLC model, the voltage where all the trap sites inside the dielectric layer are filled with charge carriers is defined as  $V_{\text{TFL}}$  (trap-filling limit voltage). With sufficient amount of traps, the current abruptly increase for several orders of magnitude in the SCLC trap-free regime.  $N_t$ , trap density can be presented with the following simple expression:

$$N_t \cong \frac{\epsilon_0 \epsilon_r V_{\text{TFL}}}{e L^2}$$

where  $\epsilon_0$  is the permittivity of free space, and  $\epsilon_r$  the dielectric constant of the dielectric layer.  $L$  represents the thickness of BCPO layer (65 nm). Therefore, the trap density is estimated to be  $1.15 \times 10^{17} \text{ cm}^{-3}$ .<sup>1</sup>

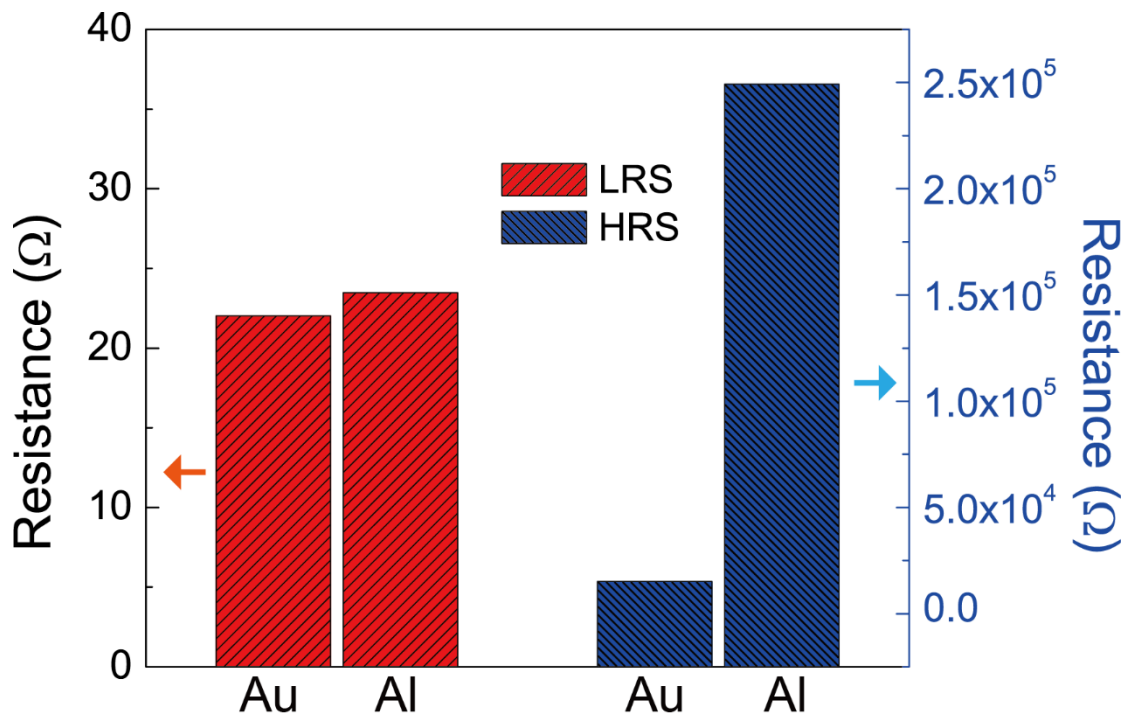

**Fig. S7** Histogram of resistance comparison for devices with Au and Al top electrode at a read voltage of +0.5 V (red for LRS, blue for HRS).

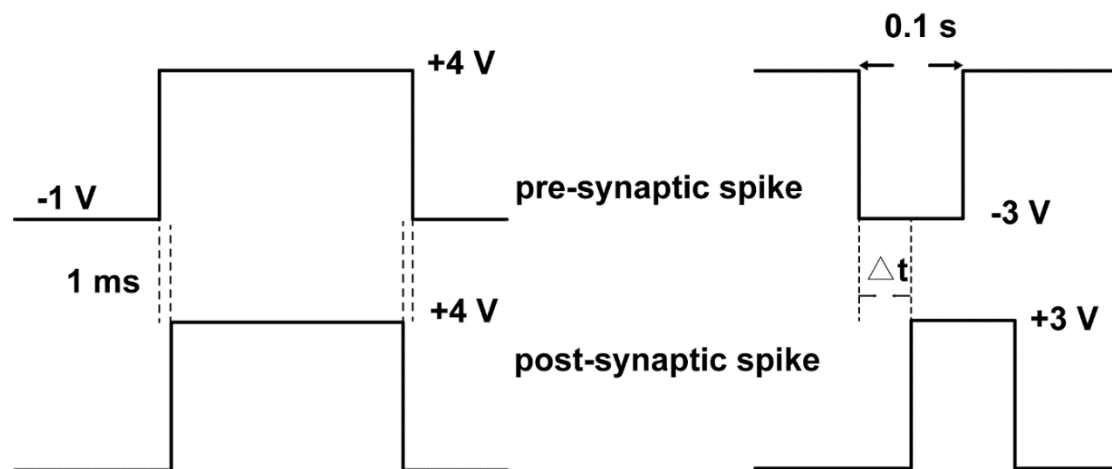

**Fig. S8** Waveforms for two STDP forms, symmetric Hebbian learning rule and symmetric anti-Hebbian rule, respectively.
